# Supplementary material
Source: HighWire-hosted journal article supplement (https://erj.ersjournals.com/content/52/3/1800684)
Supplement: inline-supplementary-material-1 [file inline-supplementary-material-1.pdf]

## SUPPLEMENTARY MATERIAL

### Missed opportunity? Worsening breathlessness as a harbinger of death: a cohort study

David C. Currow, Joanna M. Smith, Phichai Chansriwong, Simon I.R. Noble, Theodora Nikolaidou, Diana Ferreira, Miriam J. Johnson and Magnus Ekström

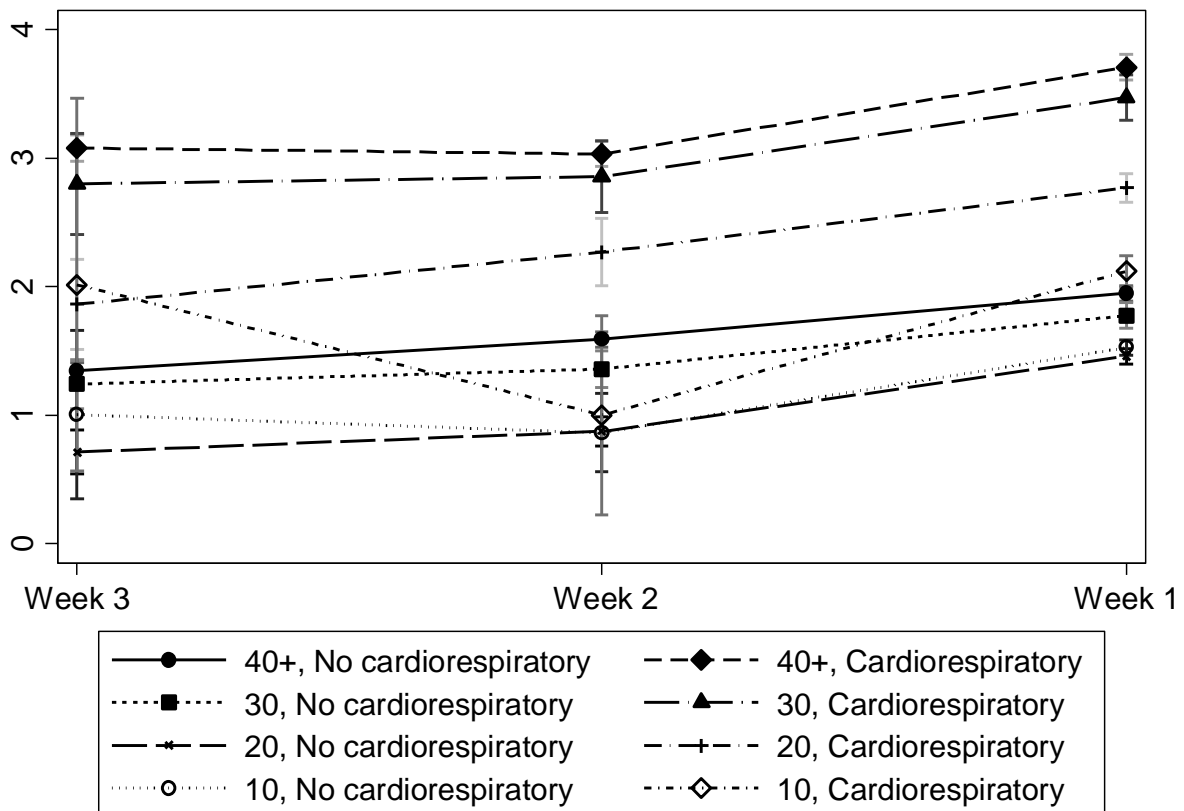

**SUPPLEMENTARY FIGURE S1** Adjusted mean breathlessness intensity scores on a 0–10 numerical rating scale in the 3 weeks before death by diagnosis (cardiorespiratory life-limiting illness or not) and functional status (10, 20, 30 and  $\geq 40$  using the Australia-modified Karnofsky Performance Status scale) having adjusted for age, sex and length of stay. 6768 clients with 48,385 observations. People with a cardiorespiratory life-limiting illness had higher breathlessness intensity scores (adjusted mean 2.92) than people with no documented cardiorespiratory diagnosis on each day (adjusted mean 1.51;  $p=0.0001$ ).
